# Supplementary material
Source: Research Square preprint supplement (doi:10.21203/rs.3.rs-9444718/v1)
Supplement: Supplementary file 1 [file b7535a2b135d610b79d16703.docx]

Additional file 1**.** The Norwegian-language version of TeamSTEPPS Teamwork Perceptions Questionnaire (T-TPQ) for use in ambulance services.

| **Teamstruktur (T)** | |
| --- | --- |
| T1 | Kompetansen til ambulansepersonell er tilstrekkelig overlappende slik at enkelte arbeidsoppgaver kan deles på når det er nødvendig |
| T2 | Ambulansepersonell blir holdt ansvarlig for egne handlinger |
| T3 | Ambulansepersonell ved ambulansestasjonen deler informasjon på en måte som gjør det mulig for pasientens behandlingsteam å ta gode beslutninger i rett tid |
| T4 | Ved ambulansestasjonen utnyttes ressursene på en hensiktsmessig måte (eks. bemanning, utstyr og informasjon) |
| T5 | Ambulansepersonell har en klar oppfattelse av egne roller og ansvar |
| T6 | Ambulansestasjonen har klart formulerte mål |
| T7 | Ambulansestasjonen fungerer på en hensiktsmessig måte |
| **Ledelse (L)** | |
| L1 | Teamledere vurderer innspill fra øvrige ambulansepersonell når det tas beslutninger vedrørende pasientbehandling |
| L2 | Ledelse legger til rette for å diskutere ambulansepersonellets opptreden etter en situasjon som kunne ha ført til, eller førte til en uønsket hendelse for pasienten |
| L3 | Ledelsen tar seg tid til å møte ambulansepersonellet ved ambulansestasjonen for å utvikle planer/prosedyrer/retningslinjer for pasientbehandling |
| L4 | Ledelsen sørger for at det er tilstrekkelig ressurser tilgjengelig (eks. bemanning, utstyr og informasjon) |
| L5 | Ledelsen håndterer konflikter på en god måte |
| L6 | Ledelsen er gode rollemodeller når det gjelder teamadferd |
| L7 | Ledelsen sørger for at ambulansepersonellet ved ambulansestasjonene er oppmerksomme på situasjoner eller endringer som kan påvirke pasienters behandling |
| **Situasjonsovervåking (S)** | |
| S1 | Ambulansepersonell er flinke til å forutse hverandres behov |
| S2 | Ambulansepersonell observerer hverandre i utførelsen av arbeidsoppgaver |
| S3 | Ambulansepersonell utveksler relevant informasjon så fort den blir tilgjengelig |
| S4 | Ambulansepersonell følger nøye med på alt i omgivelsene rundt pasienten for å innhente viktig informasjon |
| S5 | Ambulansepersonell deler informasjon om potensielle problemer som oppstår (eks. endringer i pasientens tilstand) |
| S6 | Ambulansepersonell revurderer sammen planen for pasientens behandling når situasjonen har endret seg |
| S7 | Ambulansepersonell korrigerer hverandre slik at enhetens prosedyrer blir hensiktsmessig fulgt |
| **Gjensidig Støtte (GS)** | |
| GS1 | Ambulansepersonell hjelper hverandre når det er mye å gjøre |
| GS2 | Ambulansepersonell spør om hjelp fra kollegaer når de føler at det blir for mye for dem |
| GS3 | Ambulansepersonell advarer hverandre om potensielt faretruende situasjoner |
| GS4 | Tilbakemeldinger gis til hverandre på en måte som fremmer positivt samarbeid og som fører til fremtidige endringer |
| GS5 | Ambulansepersonell taler pasientens sak, selv når det kommer i konflikt med det som hevdes av en mer erfaren/overordnet kollega eller samarbeidspartner |
| GS6 | Når ambulansepersonell er bekymret for pasientsikkerheten, sier de tydelig ifra til hverandre og gir seg ikke før de er sikre på at bekymringen er blitt hørt |
| GS7 | Ambulansepersonell løser konflikter seg imellom, også når konfliktene er personlige |
| **Kommunikasjon (K)** | |
| K1 | Informasjon om pasientbehandling blir formidlet til pasientene og deres pårørende på et forståelig språk |
| K2 | Ambulansepersonell formidler relevant informasjon til pasienter og deres pårørende så fort som mulig |
| K3 | Når ambulansepersonell kommuniserer med pasienten, sørger de alltid for at det er tid og rom for spørsmål |
| K4 | Ambulansepersonell bruker felles terminologi/fagspråk når de kommuniserer med hverandre |
| K5 | Ambulansepersonell gir verbal bekreftelse på mottak av viktig informasjon til hverandre |
| K6 | Ambulansepersonell følger en standardisert metode for informasjonsutveksling ved pasientoverføringer (eks. i akuttmottak eller til andre avdelinger) |
| K7 | Ambulansepersonell innhenter informasjon fra alle tilgjengelige kilder (eks. pasienten, pårørende, teamet, journal, laboratoriesvar, forskning) |
| Skala: Svært enig/Enig/Nøytral/Uenig/Svært uenig | |
